# Supplementary material for: Strong sensitivity enhancement in lifetime-based luminescence thermometry by co-doping of SrTiO3:Mn4+ nanocrystals with trivalent lanthanide ions
Source: Royal Society of Chemistry journal article supplement (doi:10.1039/d1tc02814f), 2021-01-01
Supplement: d1tc02814f1.pdf [file d1tc02814f1.pdf]

## Supporting Information

### Strong sensitivity enhancement in lifetime-based luminescence thermometry by co-doping of SrTiO<sub>3</sub>:Mn<sup>4+</sup> nanocrystals with trivalent lanthanide ions

W. M. Piotrowski<sup>1</sup>, K. Trejgis<sup>1</sup>, M. Dramicanin<sup>2</sup>, L. Marciniak<sup>1\*</sup>

<sup>1</sup>Institute of Low Temperature and Structure Research, Polish Academy of Sciences, Okólna 2, 50-422 Wrocław,  
Poland

<sup>2</sup>Vinča Institute of Nuclear Sciences - National Institute of the Republic of Serbia, University of Belgrade, P.O. Box 522,  
Belgrade 11001, Serbia

\* corresponding author: [L.marciniak@intibs.pl](mailto:L.marciniak@intibs.pl)

*KEYWORDS* luminescent thermometry, emission decays, lanthanides, SrTiO<sub>3</sub>, luminescence

The average lifetime of the excited states were calculated with the equation Eq. S1:

$$\tau_{avr} = \frac{A_1\tau_1^2 + A_2\tau_2^2}{A_1\tau_1 + A_2\tau_2} \quad (\text{Eq. S1})$$

where:  $\tau_1$ ,  $\tau_2$  – the average time, which is in accordance with the relation  $\tau = t \cdot \ln(2)$  and  $A_1$ ,  $A_2$  – amplitude, which are the parameters of the doubleexponential function:

$$y = y_0 + A_1 \cdot \exp\left(-\frac{x}{t_1}\right) + A_2 \cdot \exp\left(-\frac{x}{t_2}\right) \quad (\text{Eq. S2})$$

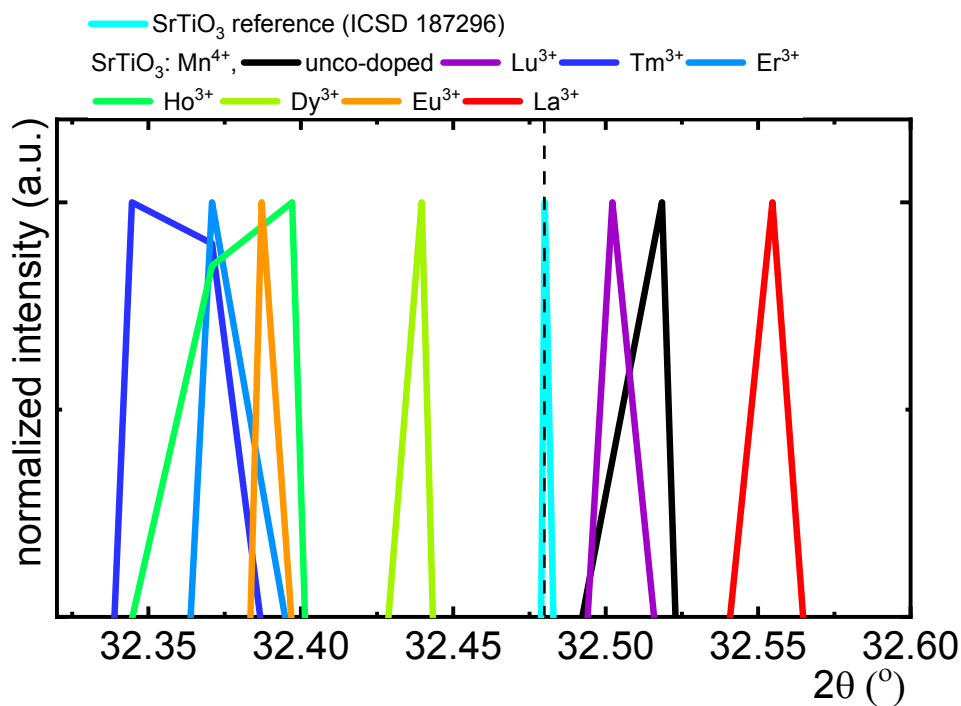

**Figure S1.** The zoom of the maximum of X-ray diffraction patterns of SrTiO<sub>3</sub>:Mn<sup>4+</sup> with different Ln<sup>3+</sup> dopants.

**Table S1.** Shannon effective ionic radii of SrTiO<sub>3</sub> lattice and dopant ions.

| Site          | Coordination number (CN) | Shannon effective ionic radii (EIR) (pm) |                    |                    |                    |                    |                    |                    |                  |
|---------------|--------------------------|------------------------------------------|--------------------|--------------------|--------------------|--------------------|--------------------|--------------------|------------------|
|               |                          | Ti <sup>4+</sup>                         | Mn <sup>4+</sup>   |                    |                    | Ti <sup>3+</sup>   |                    |                    |                  |
| octahedral    | VI (6-fold)              | 60.5                                     | 53                 |                    |                    | 67                 |                    |                    |                  |
| preferred     | VIII/X                   | Sr <sup>2+</sup>                         | Lu <sup>3+</sup>   | Tm <sup>3+</sup>   | Er <sup>3+</sup>   | Ho <sup>3+</sup>   | Dy <sup>3+</sup>   | Eu <sup>3+</sup>   | La <sup>3+</sup> |
|               | (8-/10-fold)             | -                                        | 97.7 (VIII)        | 99.4 (VIII)        | 100.4 (VIII)       | 101.5 (VIII)       | 102.7 (VIII)       | 106.6 (VIII)       | 127 (X)          |
| cuboctahedral | XII (12-fold)            | 144                                      | 120.4 <sup>e</sup> | 122.4 <sup>e</sup> | 123.4 <sup>e</sup> | 123.4 <sup>e</sup> | 125.5 <sup>e</sup> | 129.5 <sup>e</sup> | 136              |

e – extrapolated linearly (in the all cases R<sup>2</sup> > 0.9987)

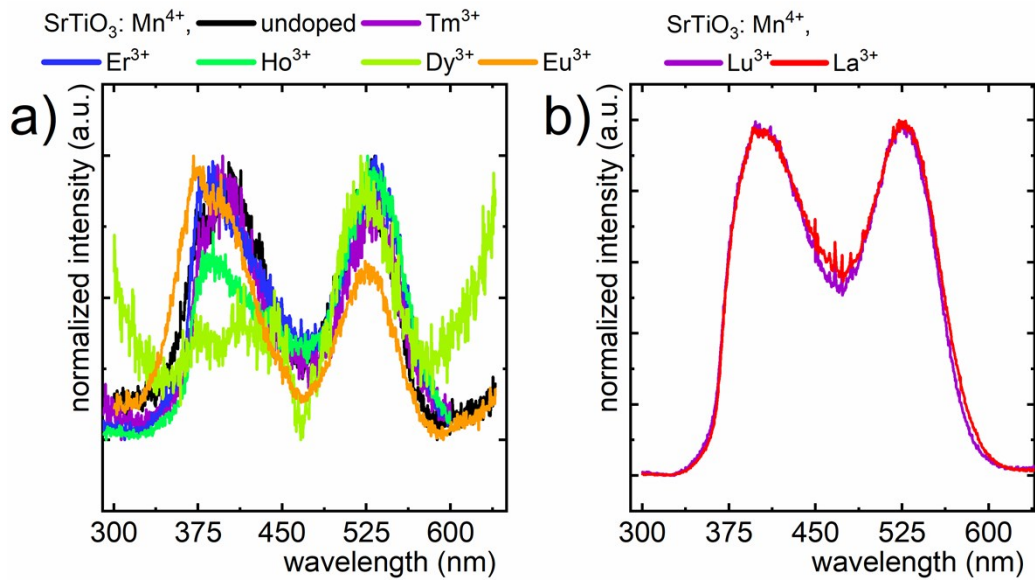

**Figure S2.** Excitation spectra of  $\text{SrTiO}_3:\text{Mn}^{4+}$ ,  $\text{Ln}^{3+}$  with different optically active-a) and passive-b)  $\text{Ln}^{3+}$  ions measured at 123 K for emission of  $\text{Mn}^{4+}$  ( $\lambda_{\text{em}} = 725 \text{ nm}$ ).

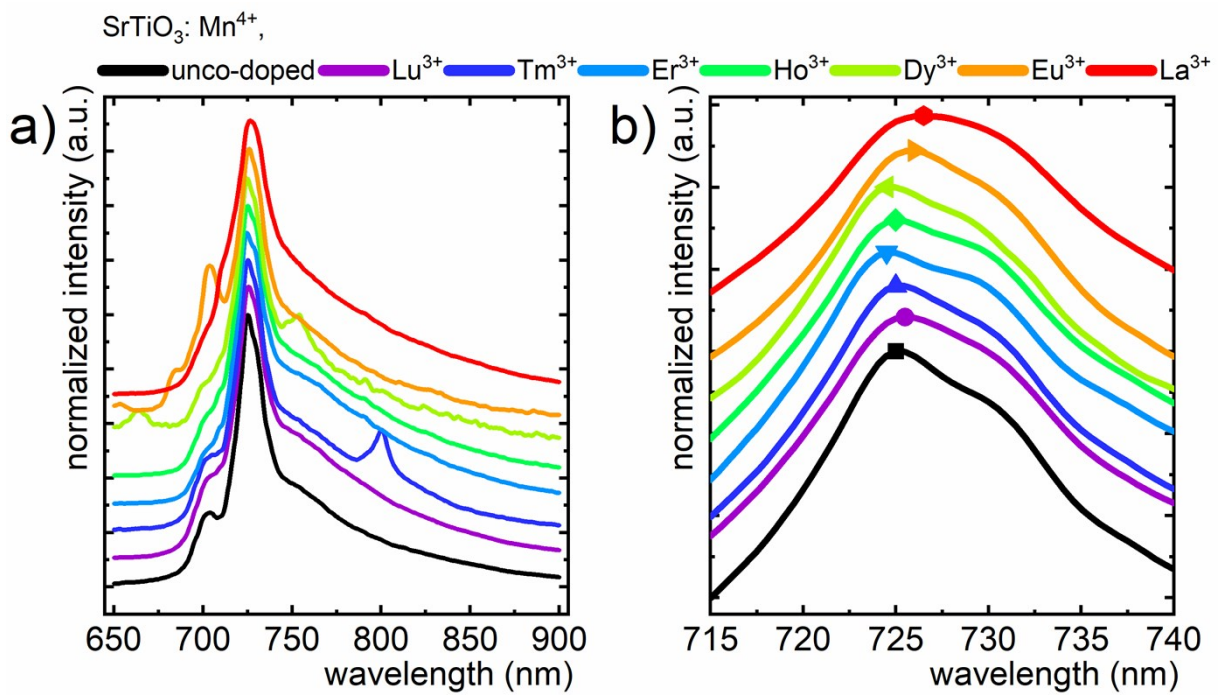

**Figure S3.** Emission spectra of  $\text{SrTiO}_3:\text{Mn}^{4+}$ ,  $\text{Ln}^{3+}$  with different  $\text{Ln}^{3+}$  ions measured with  $\lambda_{\text{exc}} = 400 \text{ nm}$  at 123 K – a) with the zoom of the same spectra in the 715-740 nm spectral range – b).

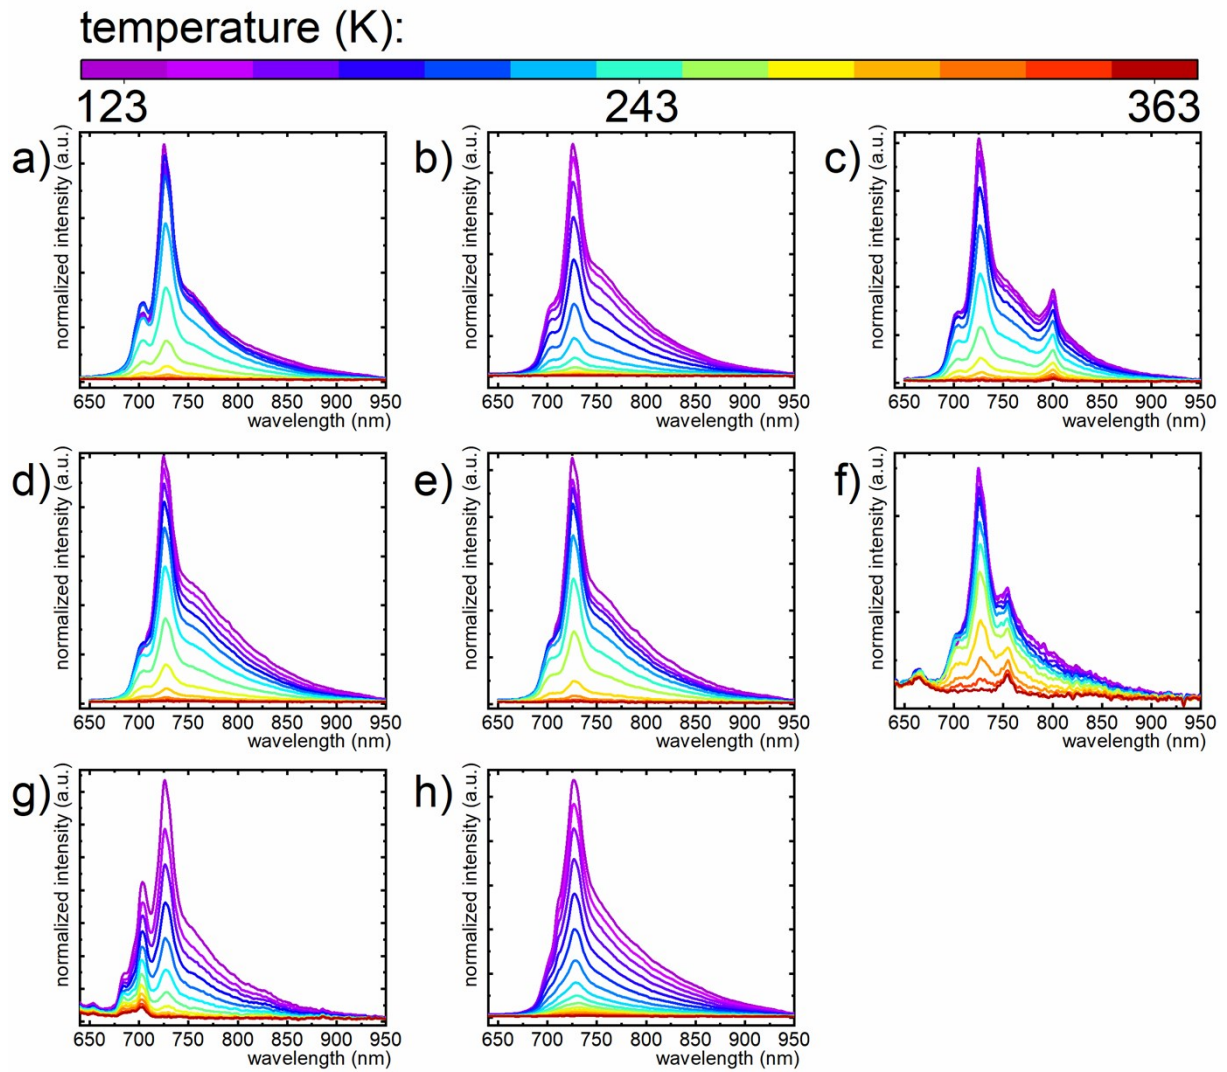

**Figure S4.** Thermal evolution of emission spectra excited by  $\lambda_{\text{exc}} = 400$  nm for the  $\text{SrTiO}_3:0.1\% \text{Mn}^{4+}$  – a) and  $\text{SrTiO}_3:0.1\% \text{Mn}^{4+}, \text{Ln}^{3+}$ , where  $\text{Ln}^{3+} = \text{Lu}^{3+}$  – b),  $\text{Tm}^{3+}$  – c),  $\text{Er}^{3+}$  – d),  $\text{Ho}^{3+}$  – e),  $\text{Dy}^{3+}$  – f),  $\text{Eu}^{3+}$  – g),  $\text{La}^{3+}$  – h).

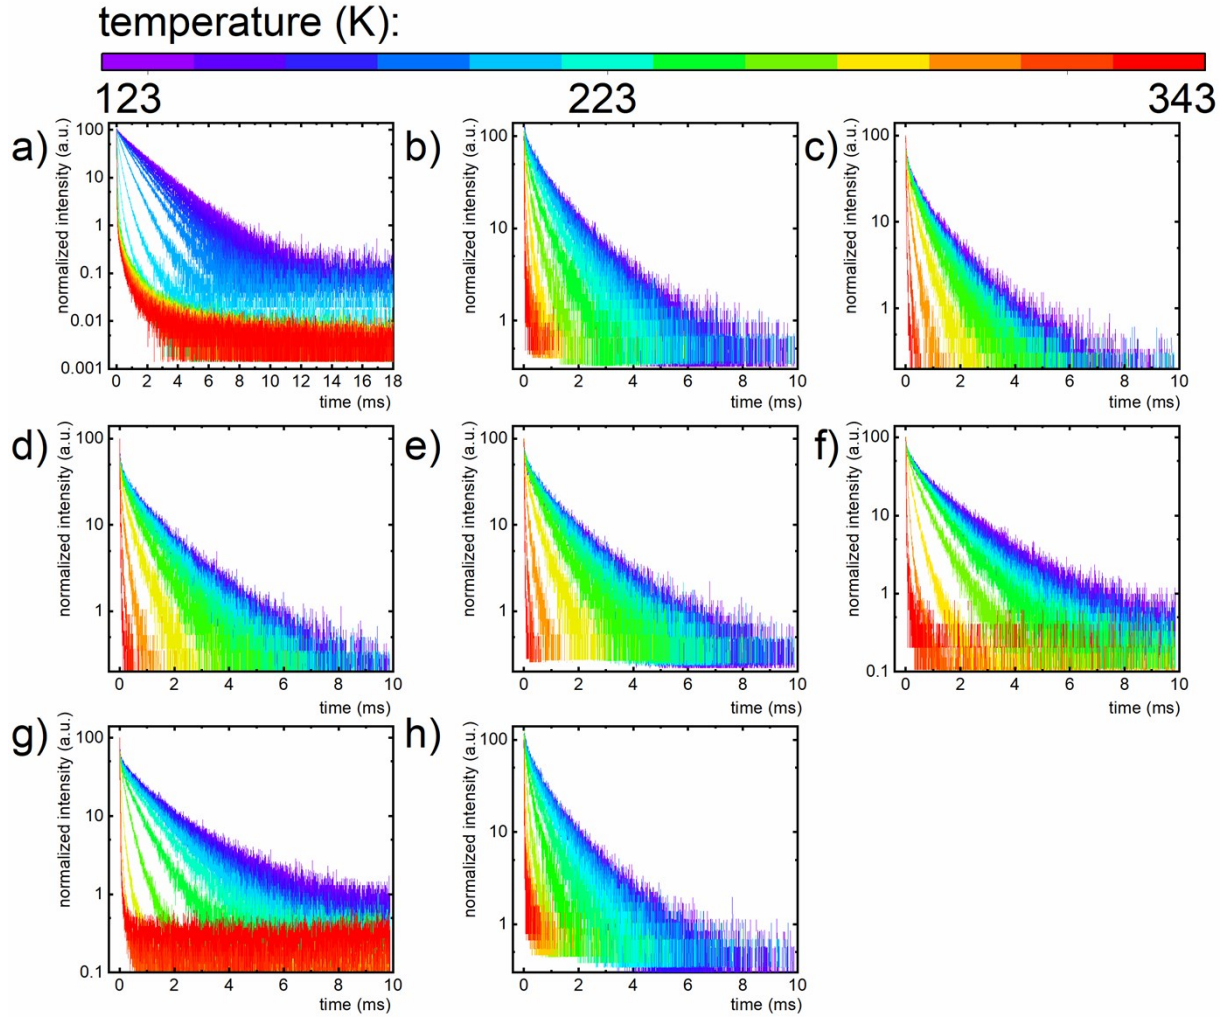

**Figure S5.** Thermal evolution of luminescent decays of  ${}^2E$  excited state of  $Mn^{4+}$  for the  $SrTiO_3:0.1\% Mn^{4+}$  – a) and  $SrTiO_3:0.1\% Mn^{4+}, Ln^{3+}$ , where  $Ln^{3+} = Lu^{3+}$  – b),  $Tm^{3+}$  – c),  $Er^{3+}$  – d),  $Ho^{3+}$  – e),  $Dy^{3+}$  – f),  $Eu^{3+}$  – g),  $La^{3+}$  – h).

**Table S2.** The comparison of energy distances of  $Ln^{3+}$  excited states from  ${}^2E$  of  $Mn^{4+}$  ions and thermometric parameters.

| co-dopant ion                                                    | $Eu^{3+}$ | $Dy^{3+}$ | $Er^{3+}$ | $Ho^{3+}$ | $Lu^{3+}$ | $La^{3+}$     | $Tm^{3+}$    |
|------------------------------------------------------------------|-----------|-----------|-----------|-----------|-----------|---------------|--------------|
| energy distance of excited state above ${}^2E$ ( $cm^{-1}$ )     | 3436      | 7228      | 1591      | 1658      | -         | -             | 689          |
| energy distance of excited state below ${}^2E$ ( $cm^{-1}$ )     | 8144      | 560       | 1107      | 299       | -         | -             | 940          |
| mean energy distance of excited state from ${}^2E$ ( $cm^{-1}$ ) | 5790      | 3894      | 1349      | 978.5     | --        | --            | 814.5        |
| $\tau_{avr}$ at 123 K (ms)                                       | 0.90      | 0.86      | 0.78      | 0.71      | 0.71      | 0.61          | 0.54         |
| local minimum value of $S_A$                                     | 2.5331    | 2.3892    | 1.9774    | 1.6879    | 2.066     | $\sim$ 0.8894 | $\sim$ 1.373 |

|                                                 | $(\mu\text{s K}^{-1})$ |        |        |        |        |              |               |
|-------------------------------------------------|------------------------|--------|--------|--------|--------|--------------|---------------|
| temperature of $S_{A \text{ min}}$ (K)          | 196.9                  | 199.8  | 182.4  | 164.9  | 173.15 | $\sim 131.4$ | $\sim 190.05$ |
| maximum value of $S_A$ ( $\mu\text{s K}^{-1}$ ) | 10.959                 | 10.003 | 10.155 | 9.4355 | 7.5298 | 6.3693       | 7.1677        |
| temperature of $S_{A \text{ max}}$ (K)          | 263.5                  | 265.2  | 254.7  | 251.9  | 249.15 | 248.9        | 261.9         |

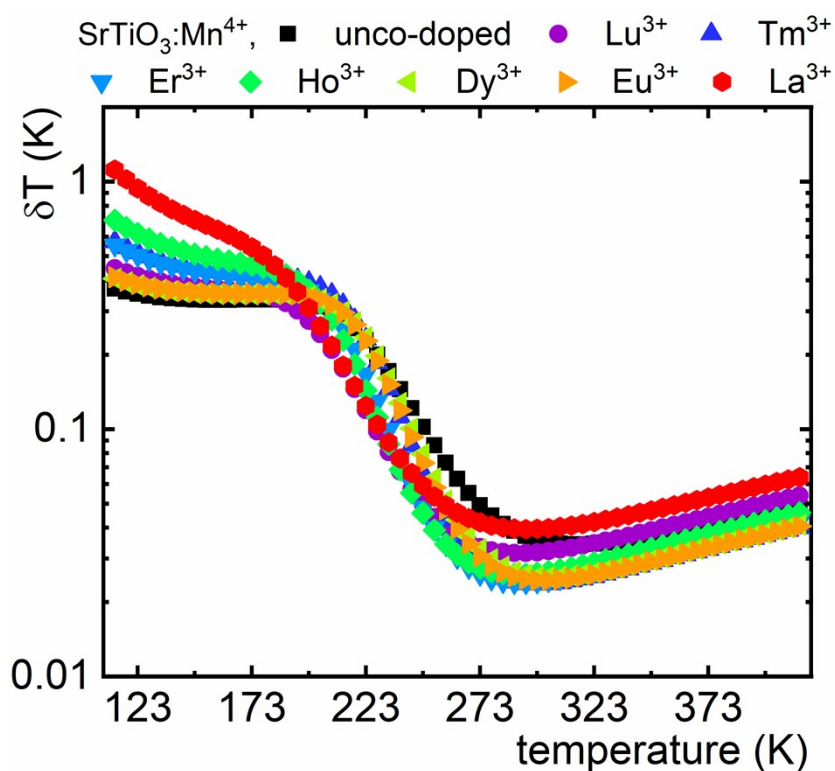

**Figure S6.** Thermal dependence of temperature estimation uncertainty for different  $\text{Ln}^{3+}$  in  $\text{SrTiO}_3:\text{Mn}^{4+}$ ,  $\text{Ln}^{3+}$  samples.



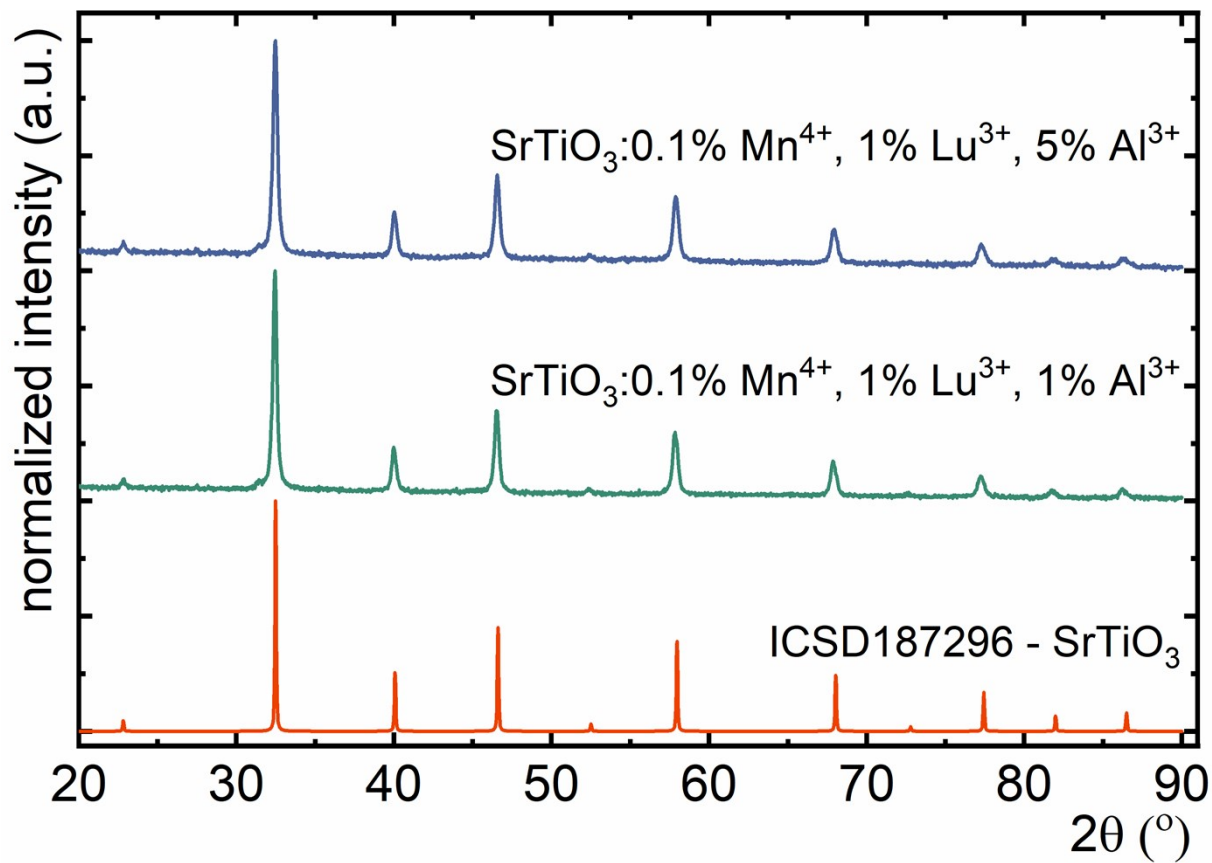

**Figure S7.** X-ray diffraction patterns of SrTiO<sub>3</sub>:Mn<sup>4+</sup>, Lu<sup>3+</sup> co-doped with 1% and 5% of Al<sup>3+</sup> ions.

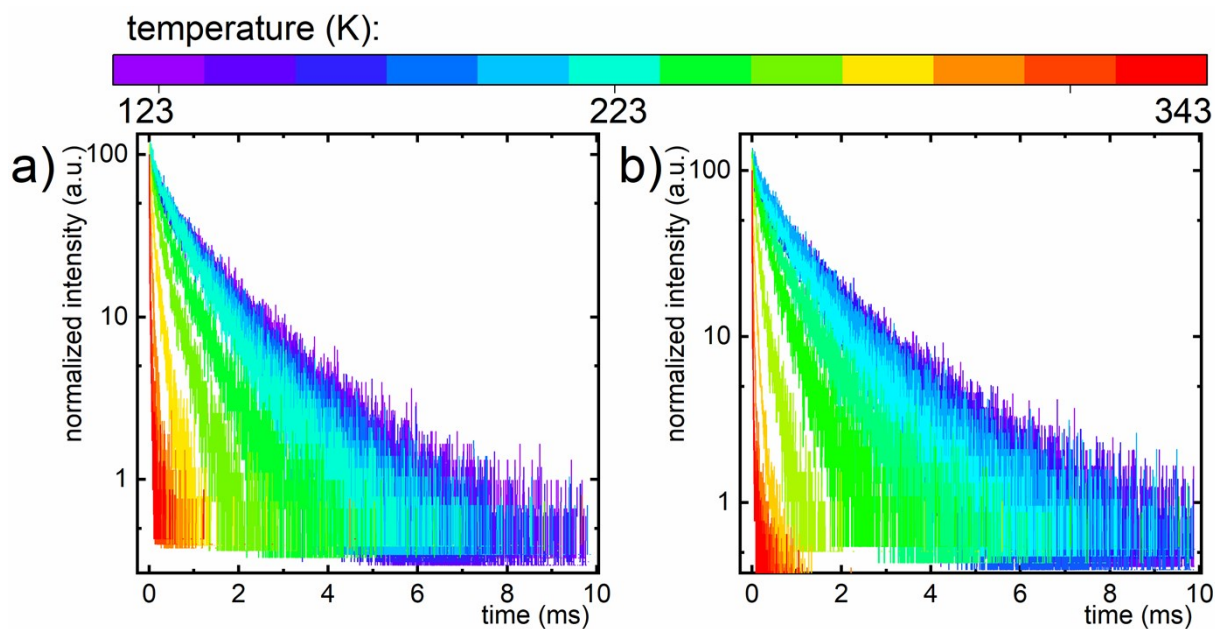

**Figure S8.** Thermal evolution of luminescent decays of <sup>2</sup>E excited state of Mn<sup>4+</sup> for the SrTiO<sub>3</sub>:0.1% Mn<sup>4+</sup>, 1% Lu<sup>3+</sup>, 1% Al<sup>3+</sup> - a and SrTiO<sub>3</sub>:0.1% Mn<sup>4+</sup>, 1% Lu<sup>3+</sup>, 5% Al<sup>3+</sup> - b.
